# THE JOURNAL OF NEUROPSYCHIATRY and Clinical Neurosciences

The Official Journal of the American Neuropsychiatric Association

## In this issue:

- A Hypothesized Role for Dendritic Remodeling in the Etiology of Mood and Anxiety Disorders
- Neuropsychological Consequence of Soccer Play in Adolescent U.K. School Team Soccer Players
- White Matter Correlates of Apathy in HIV-Positive Subjects: A Diffusion Tensor Imaging Study
- Immune Activation and Neuropsychiatric Symptoms in HIV Infection
- Nonclinical Obsessive-Compulsive Symptoms and Executive Functions in Schizophrenia

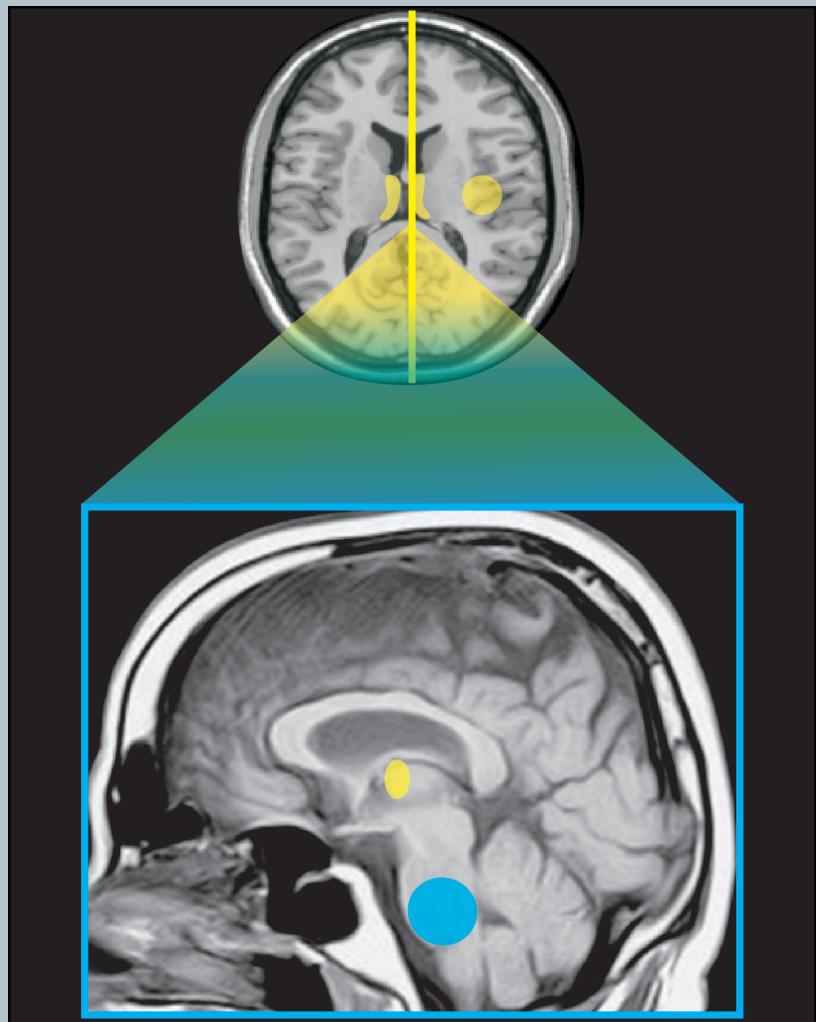

Source: https://neuro.psychiatryonline.org/doi/suppl/10.1176/jnp.2010.22.issue-3/suppl_file/cover.pdf
