# The *NEW* [www.appi.org](http://www.appi.org) makes its debut! *visit today*

## The new [www.appi.org](http://www.appi.org) offers:

- Special Discounts for American Psychiatric Association Members and Members-in-Training
- Detailed descriptions on more than 700 titles plus subscription products
- **My Account** history with order and tracking information
- Fast and easy navigation
- Enhanced search engine

The screenshot displays the homepage of the American Psychiatric Publishing, Inc. website. At the top, there is a navigation menu with links for 'Disorders', 'Subjects', 'Assessment & Treatment', 'Guides, References & Manuals', 'Books', 'Journals', and 'eContent'. A search bar is prominently featured with a 'Go' button and a link to 'Advanced Search'. Below the search bar, there are several promotional sections: 'Featured Titles' featuring 'Long-Term Psychodynamic Psychotherapy' by Glen O. Gabbard, M.D., with a 'Paperback • \$65.00' price tag and an 'Add to Cart' button; 'psychiatryonline' with the tagline 'Living Learning in Psychiatry'; 'Featured Author' for Glen O. Gabbard, M.D., with a portrait and a 'Learn More' link; 'Explore the DSM Library' with a 'Learn More' link; and 'Discover the Journals of American Psychiatric Publishing' featuring 'PSYCHIATRIC SERVICES' and 'FOCUS' with 'Learn More' links. On the right side, there are sections for 'Resources' (listing various user groups like APA Members, Educators, etc.), 'Search Books' (powered by Google), and 'Subscribe' (with a 'Sign Up' button). The footer contains copyright information for 2010 American Psychiatric Publishing, Inc. and contact details.

**Special Discount for Members:**  
**15% Discount** for APA Members  
**30% Discount** for APA Members-in-Training

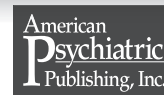

The *First* and *Last* Word in Psychiatry

American Psychiatric Publishing, Inc.  
[appi@psych.org](mailto:appi@psych.org) • 1-800-368-5777 • 703-907-7322
